# Supplementary material for: Inhibition of Drp1/Fis1 interaction slows progression of amyotrophic lateral sclerosis
Source: PubMed Central journal article supplement (PMC5840540; doi:10.15252/emmm.201708166), 2018-01-15
Supplement: EMMM-10-e8166-s001.pdf [file EMMM-10-e8166-s001.pdf]

## **Inhibition of Drp1/Fis1 interaction slows progression of Amyotrophic lateral sclerosis**

### Authors

Amit U. Joshi<sup>1</sup>, Nay L. Saw<sup>2</sup>, Hannes Vogel<sup>3</sup>, Anna. D. Cunningham<sup>1</sup>, Mehrdad Shamloo<sup>2</sup>, Daria Mochly-Rosen<sup>1</sup>

### Affiliation

<sup>1</sup>Department of Chemical and Systems Biology, Stanford University School of Medicine, Stanford, CA 94305

<sup>2</sup>Behavioral and Functional Neuroscience Laboratory, Department of Neurosurgery, Stanford University School of Medicine, Stanford, CA 94305

<sup>3</sup>Department of Pathology, Stanford University School of Medicine, Stanford, CA 94305

### **Contact information:**

[mochly@stanford.edu](mailto:mochly@stanford.edu)

Running title (50 characters including spaces): Drp1/ Fis1 interaction in ALS models

### **Table of Contents:**

Appendix Figure S1

Appendix Figure legend

Appendix Table 1



Appendix Figure S1

**A Histology**

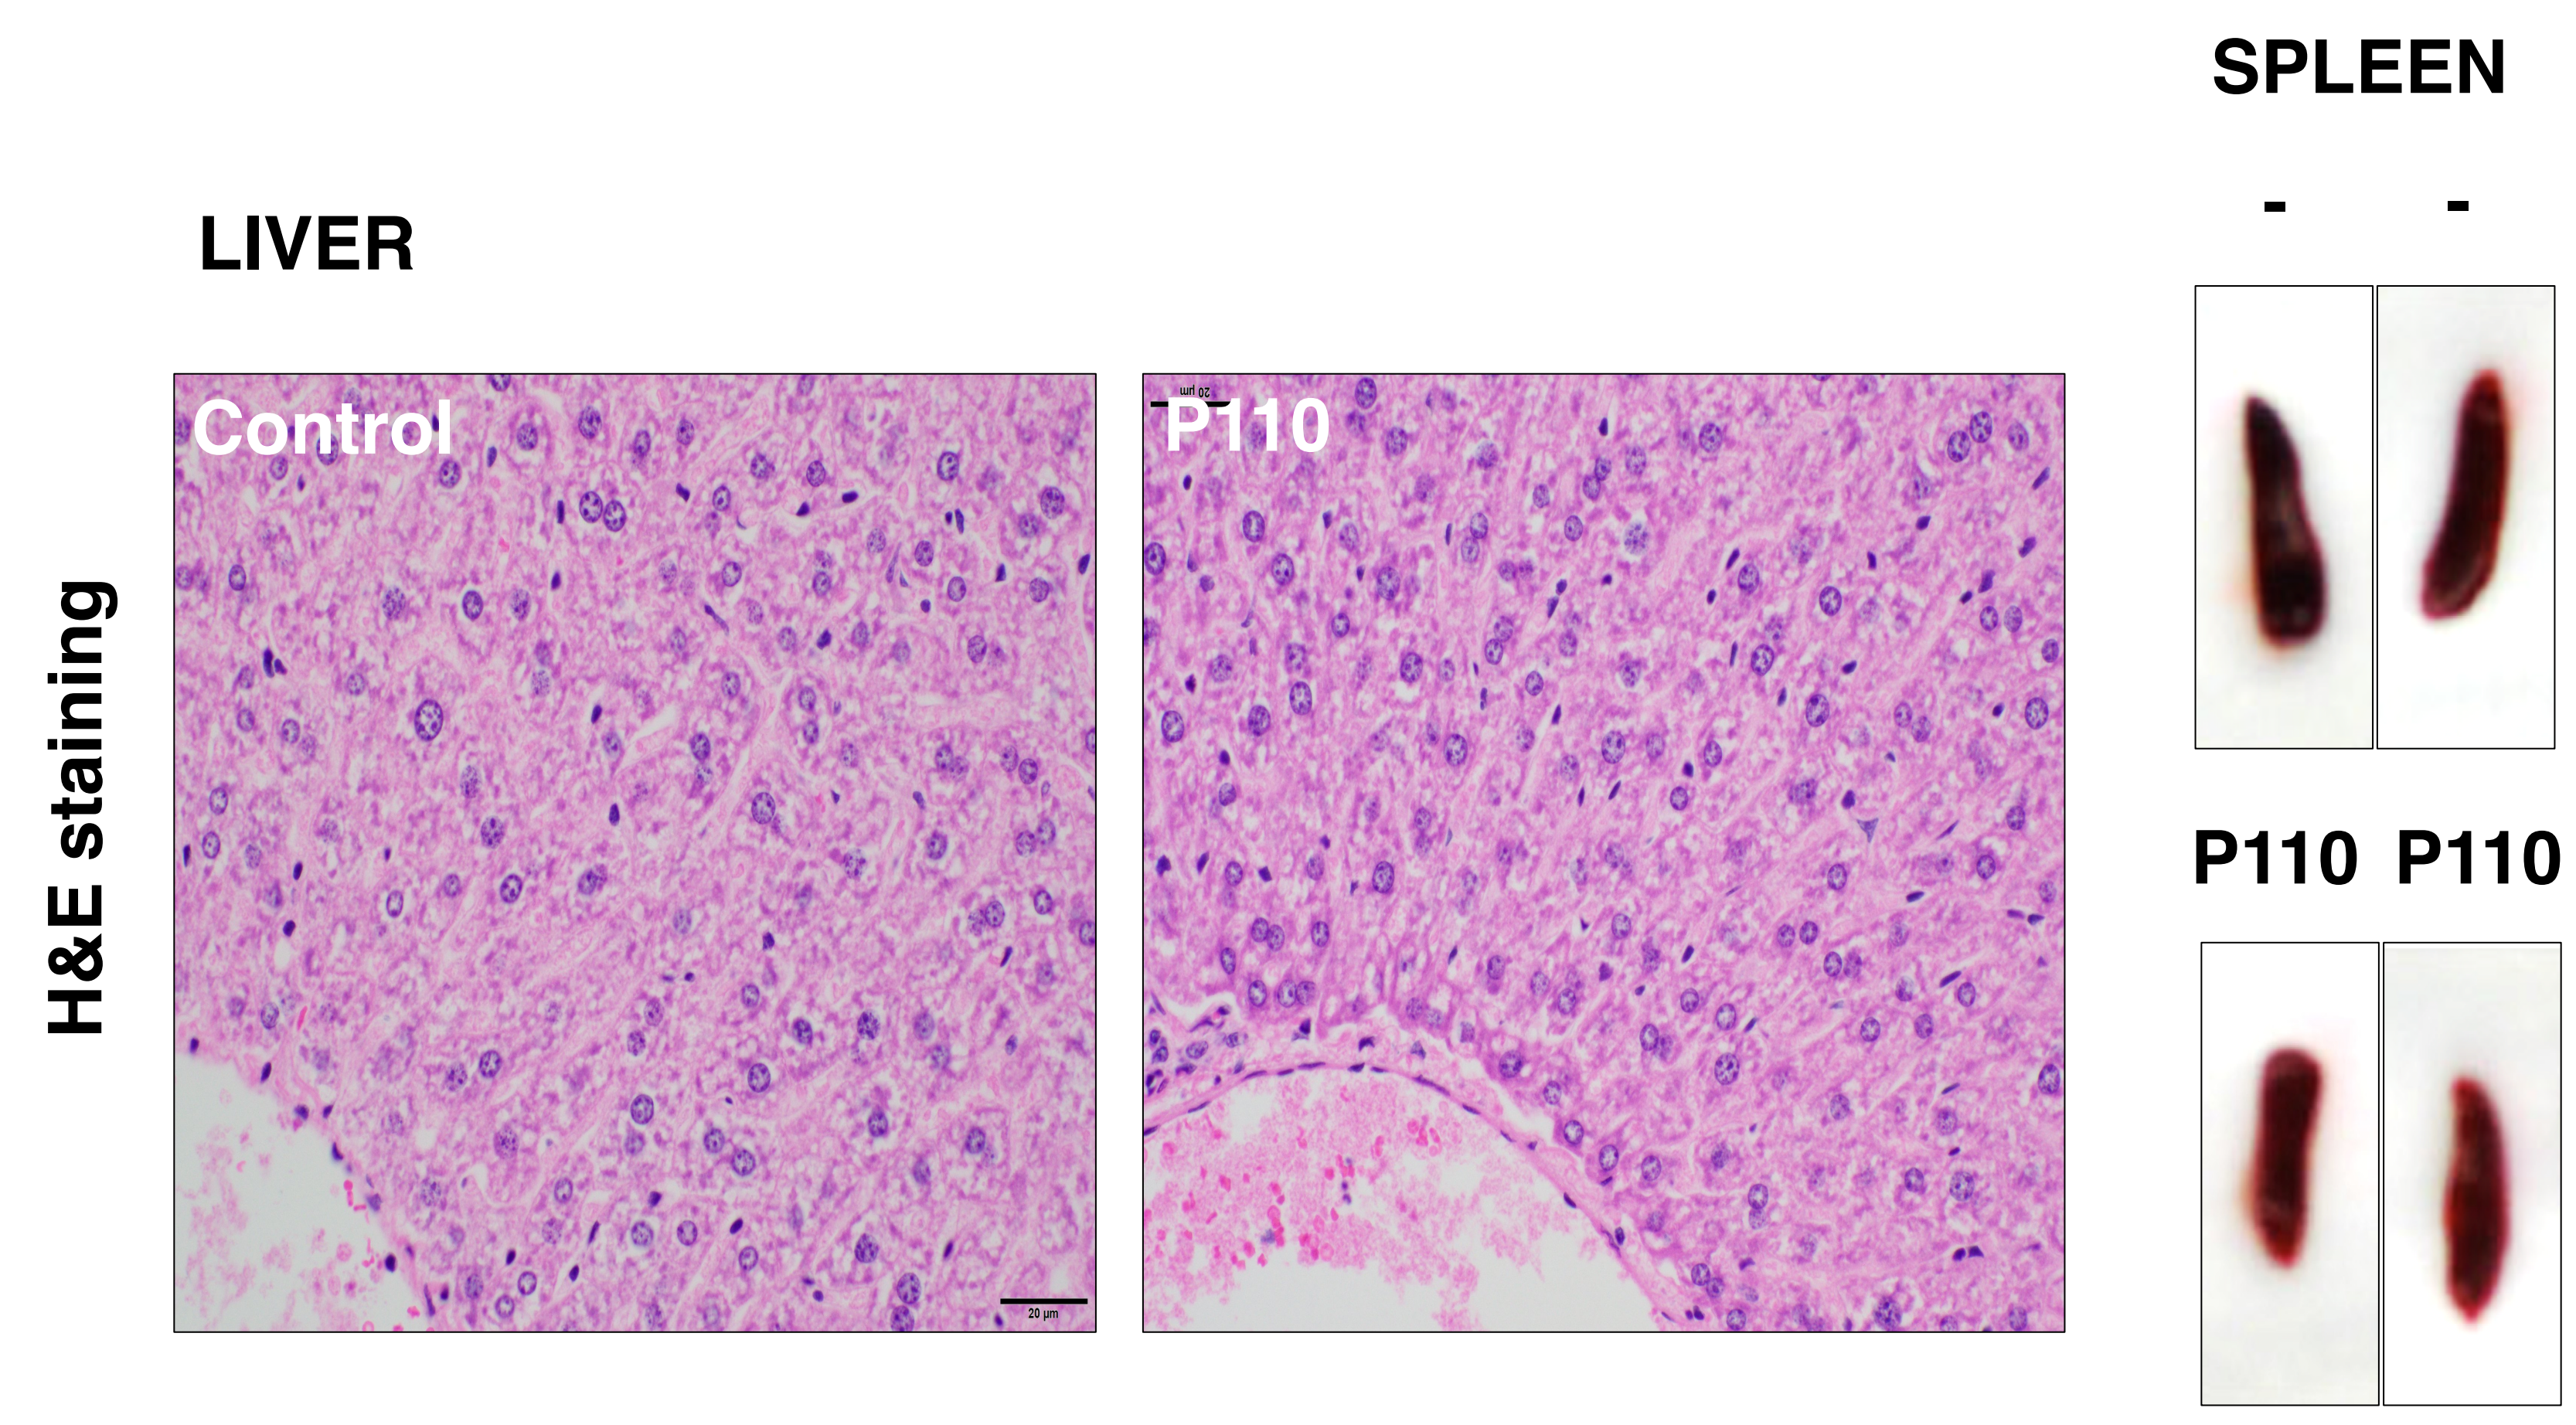

**B Mouse Activity Chamber**

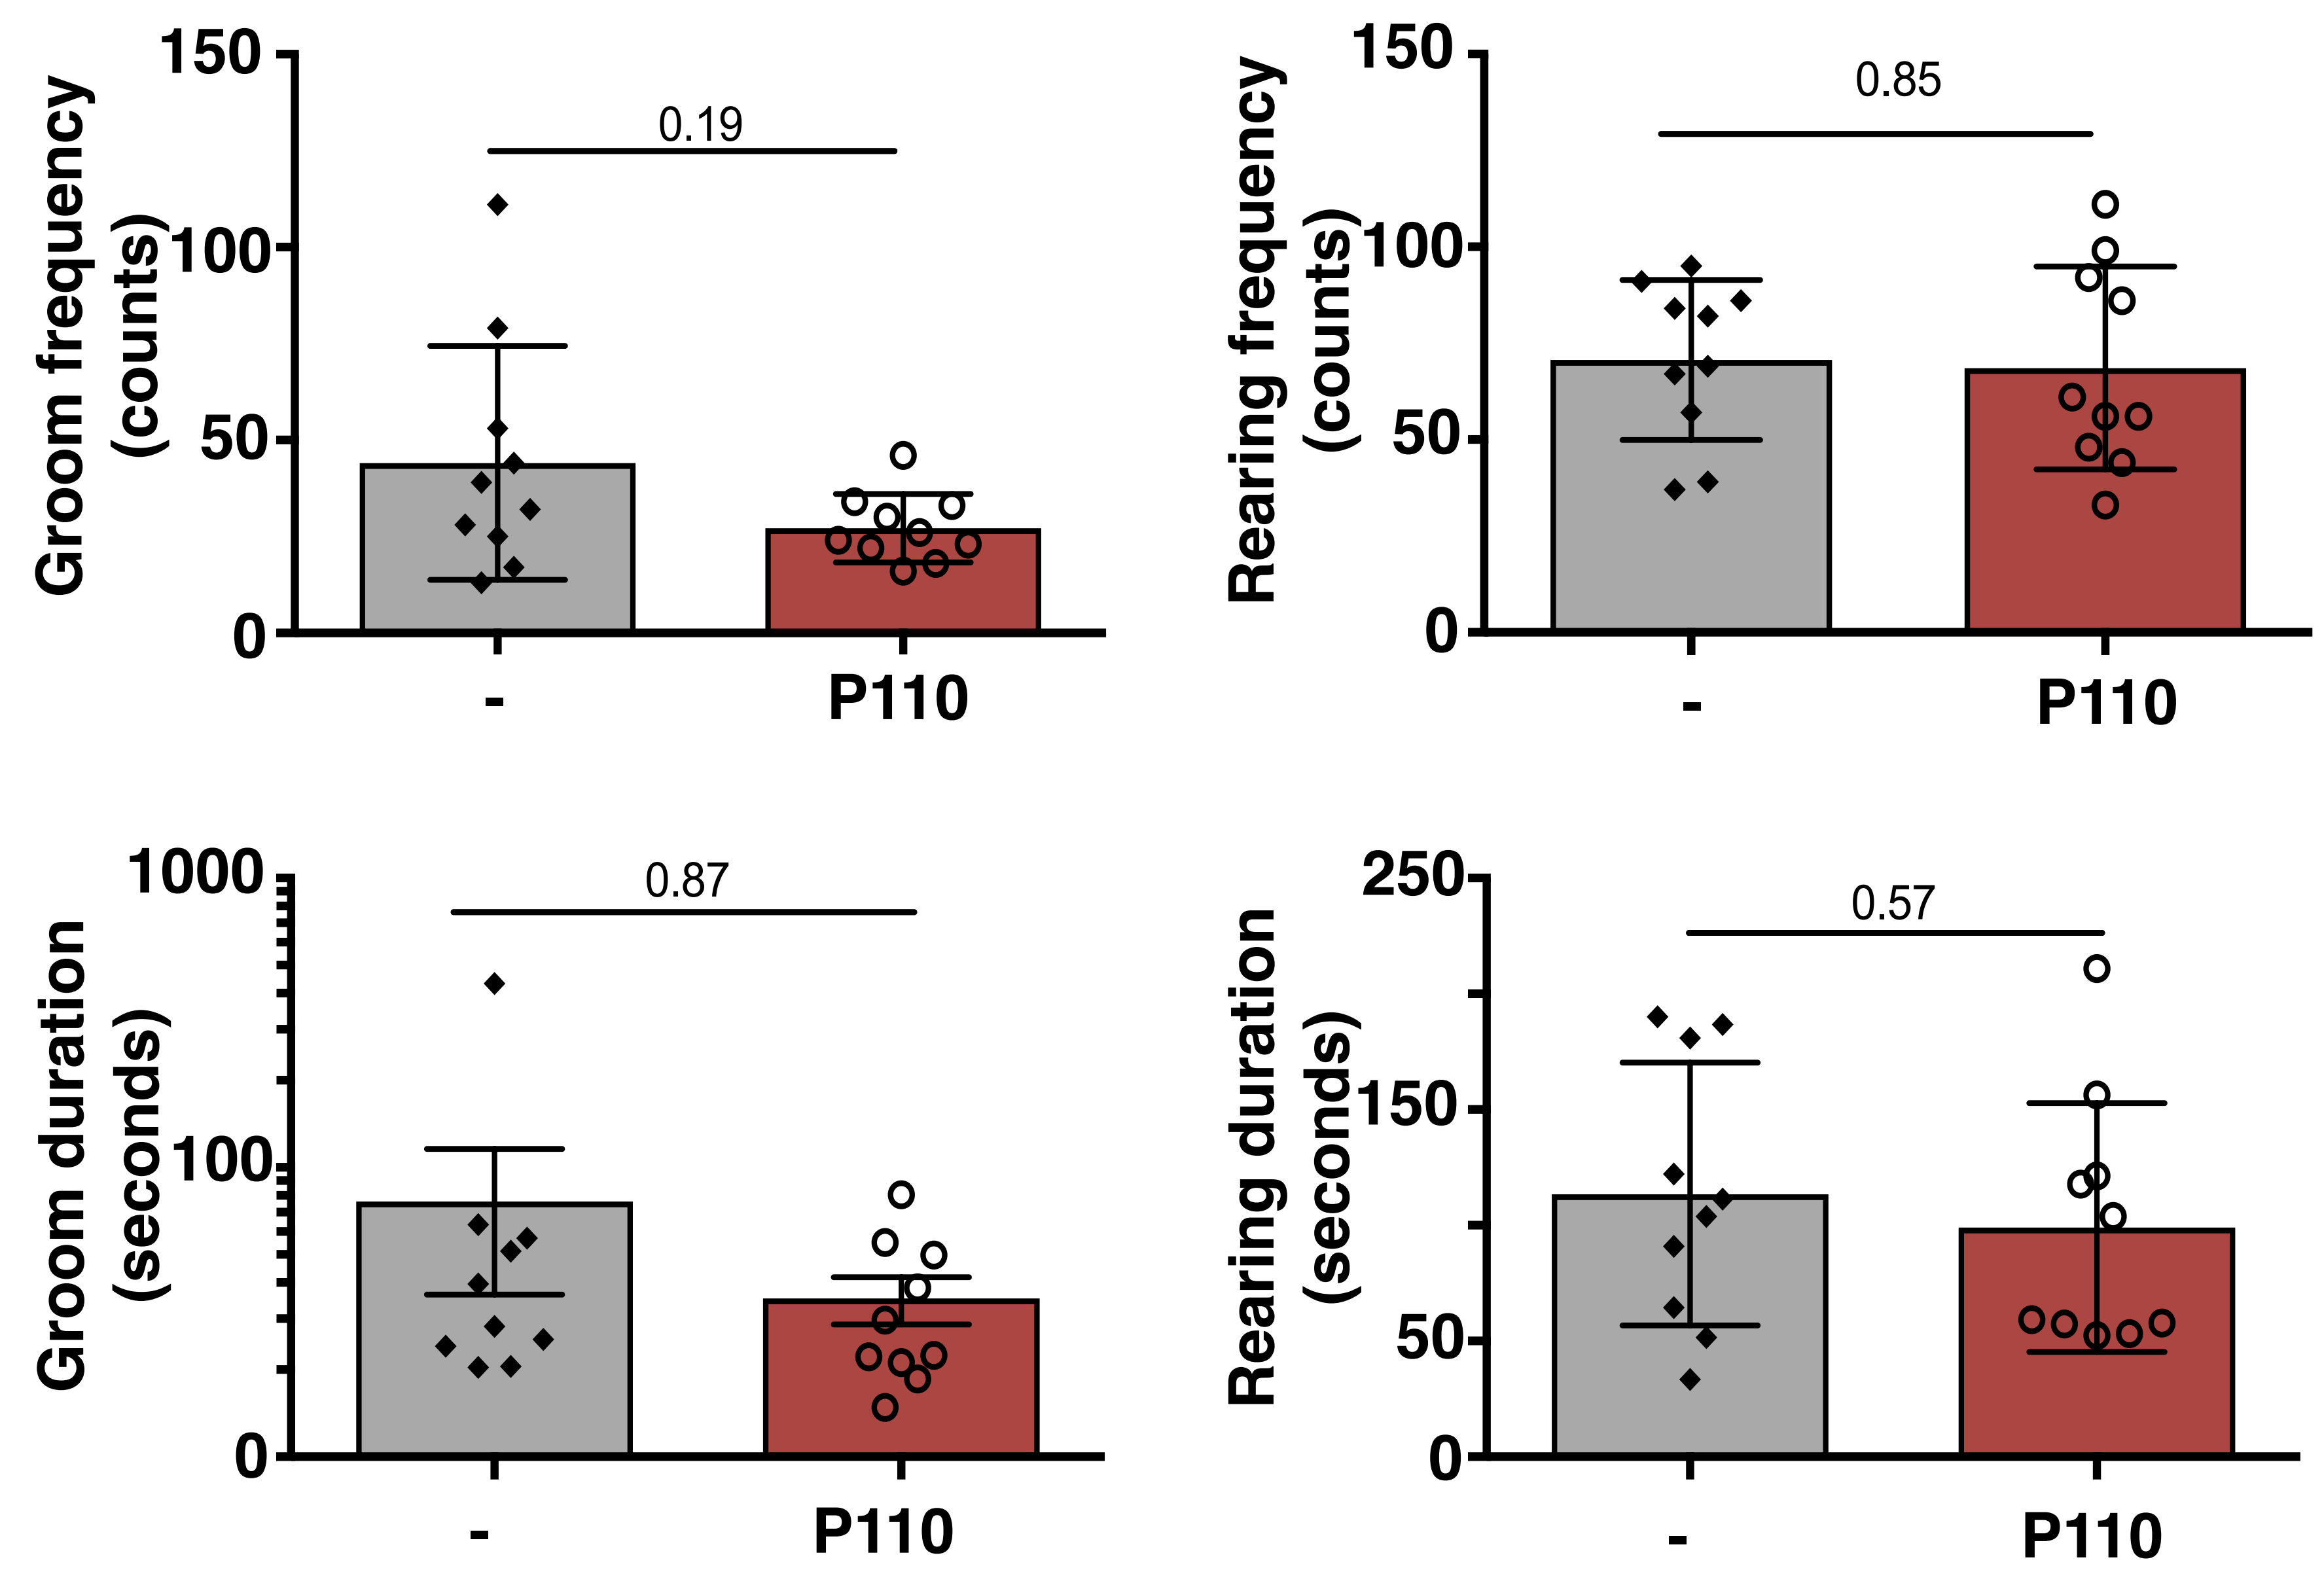

**C Cell Stress Markers**

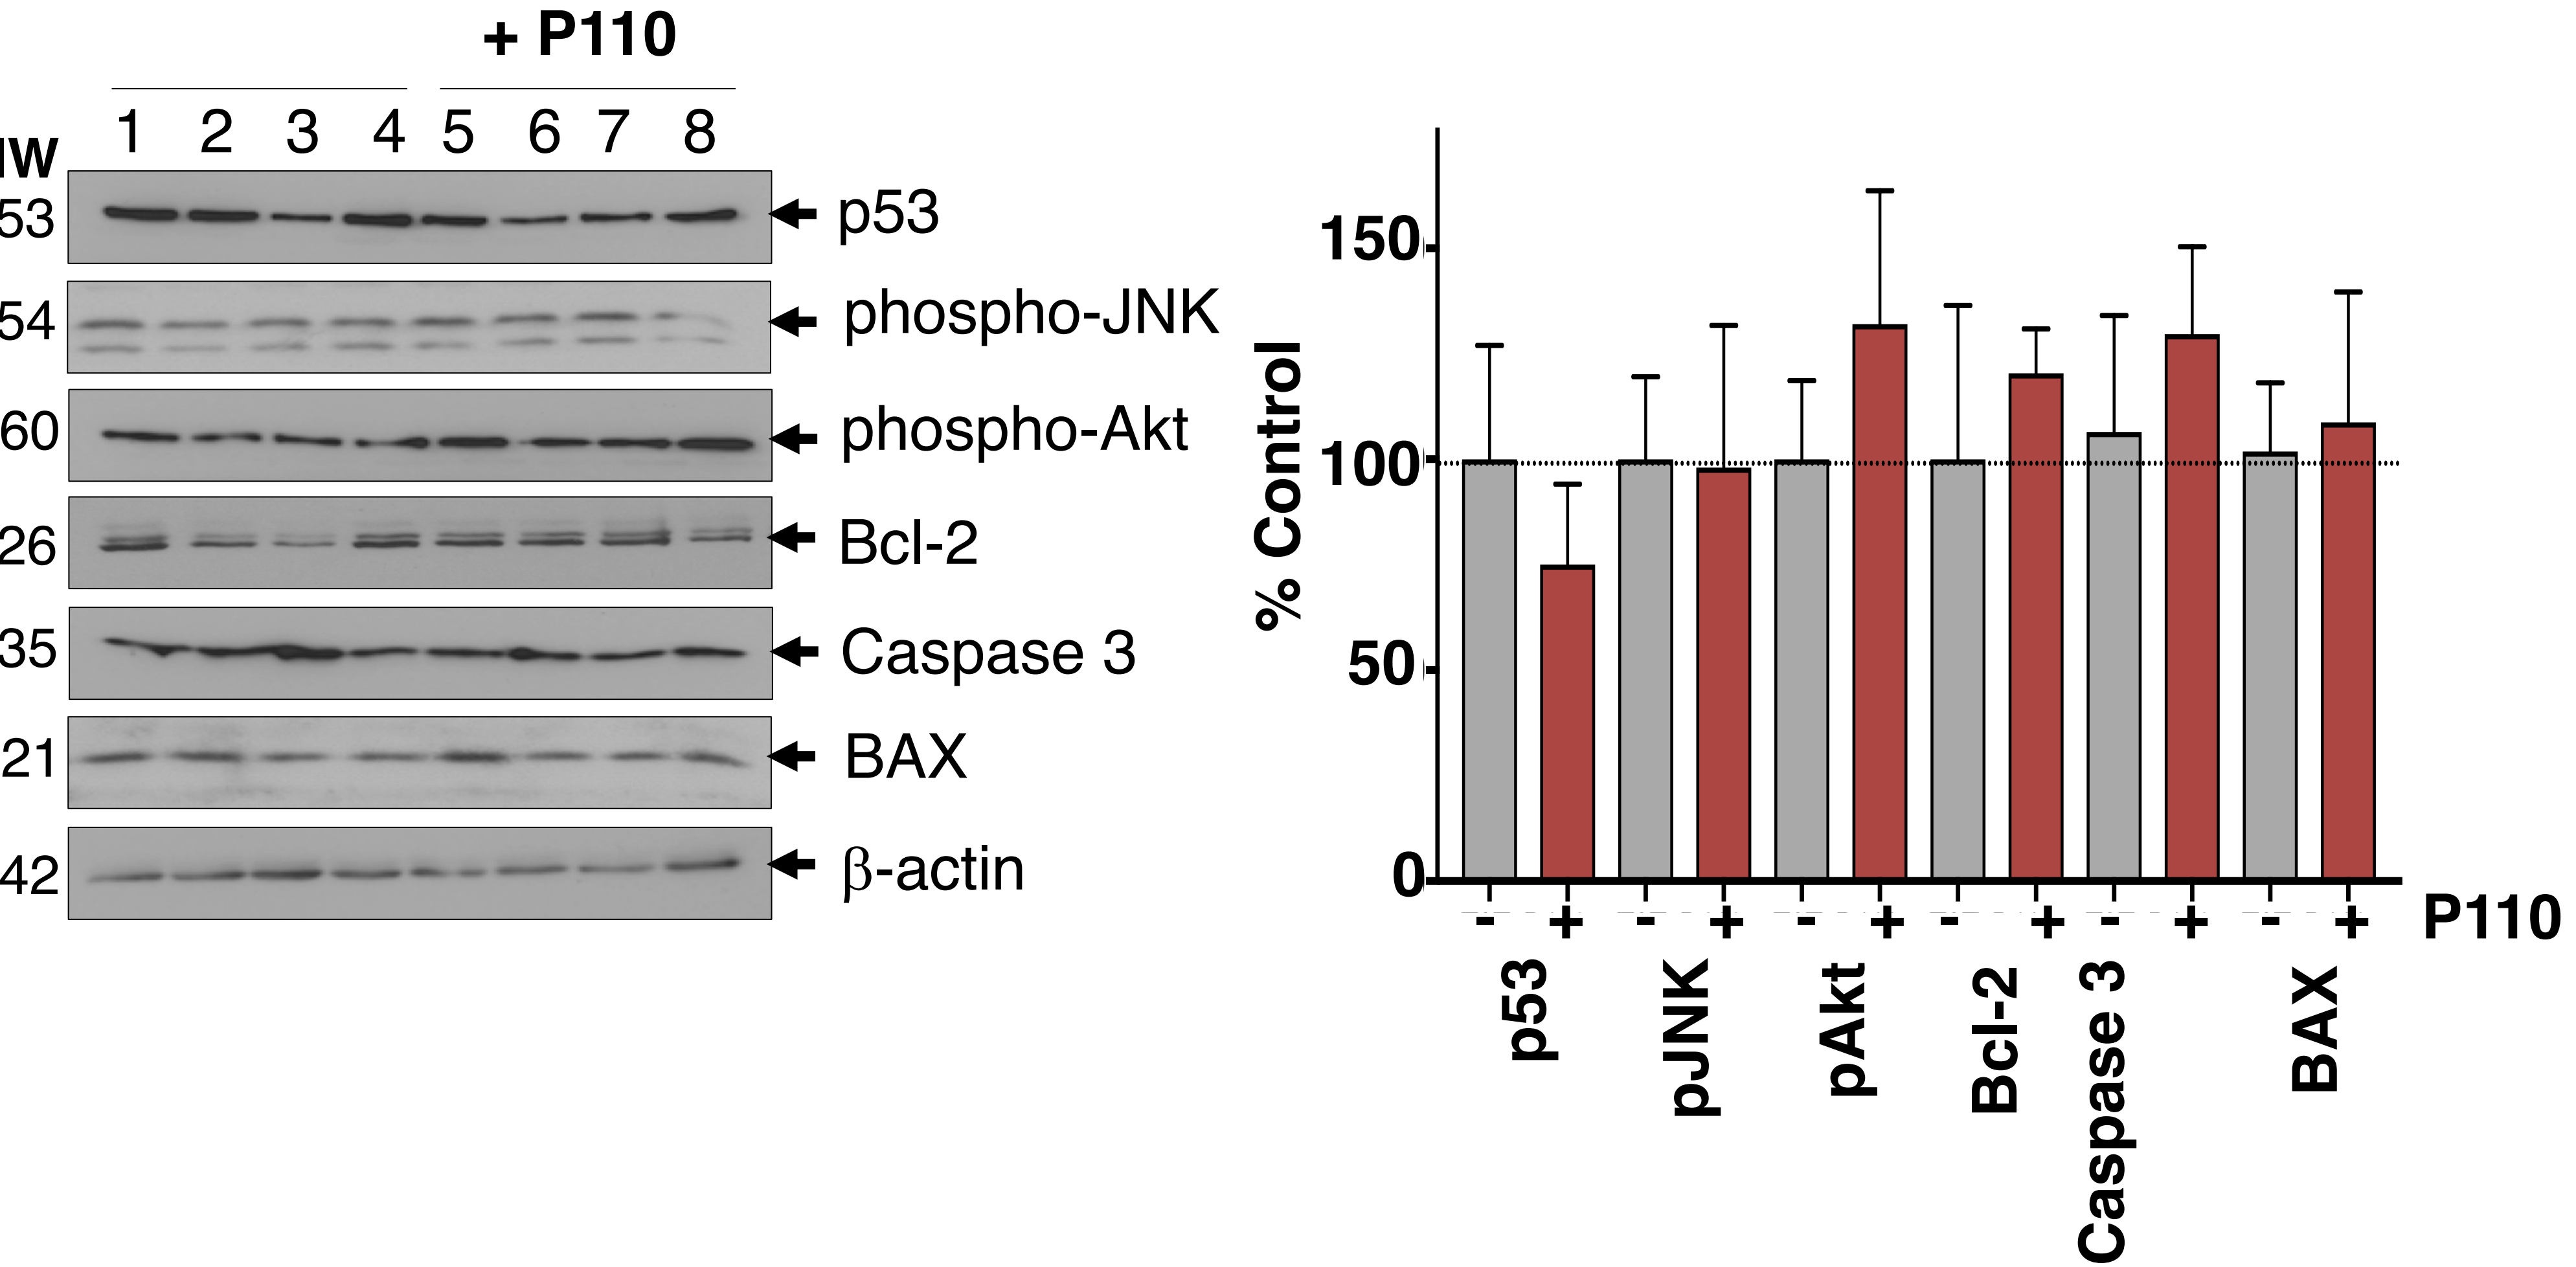

**D Mitochondrial fission and fusion proteins**

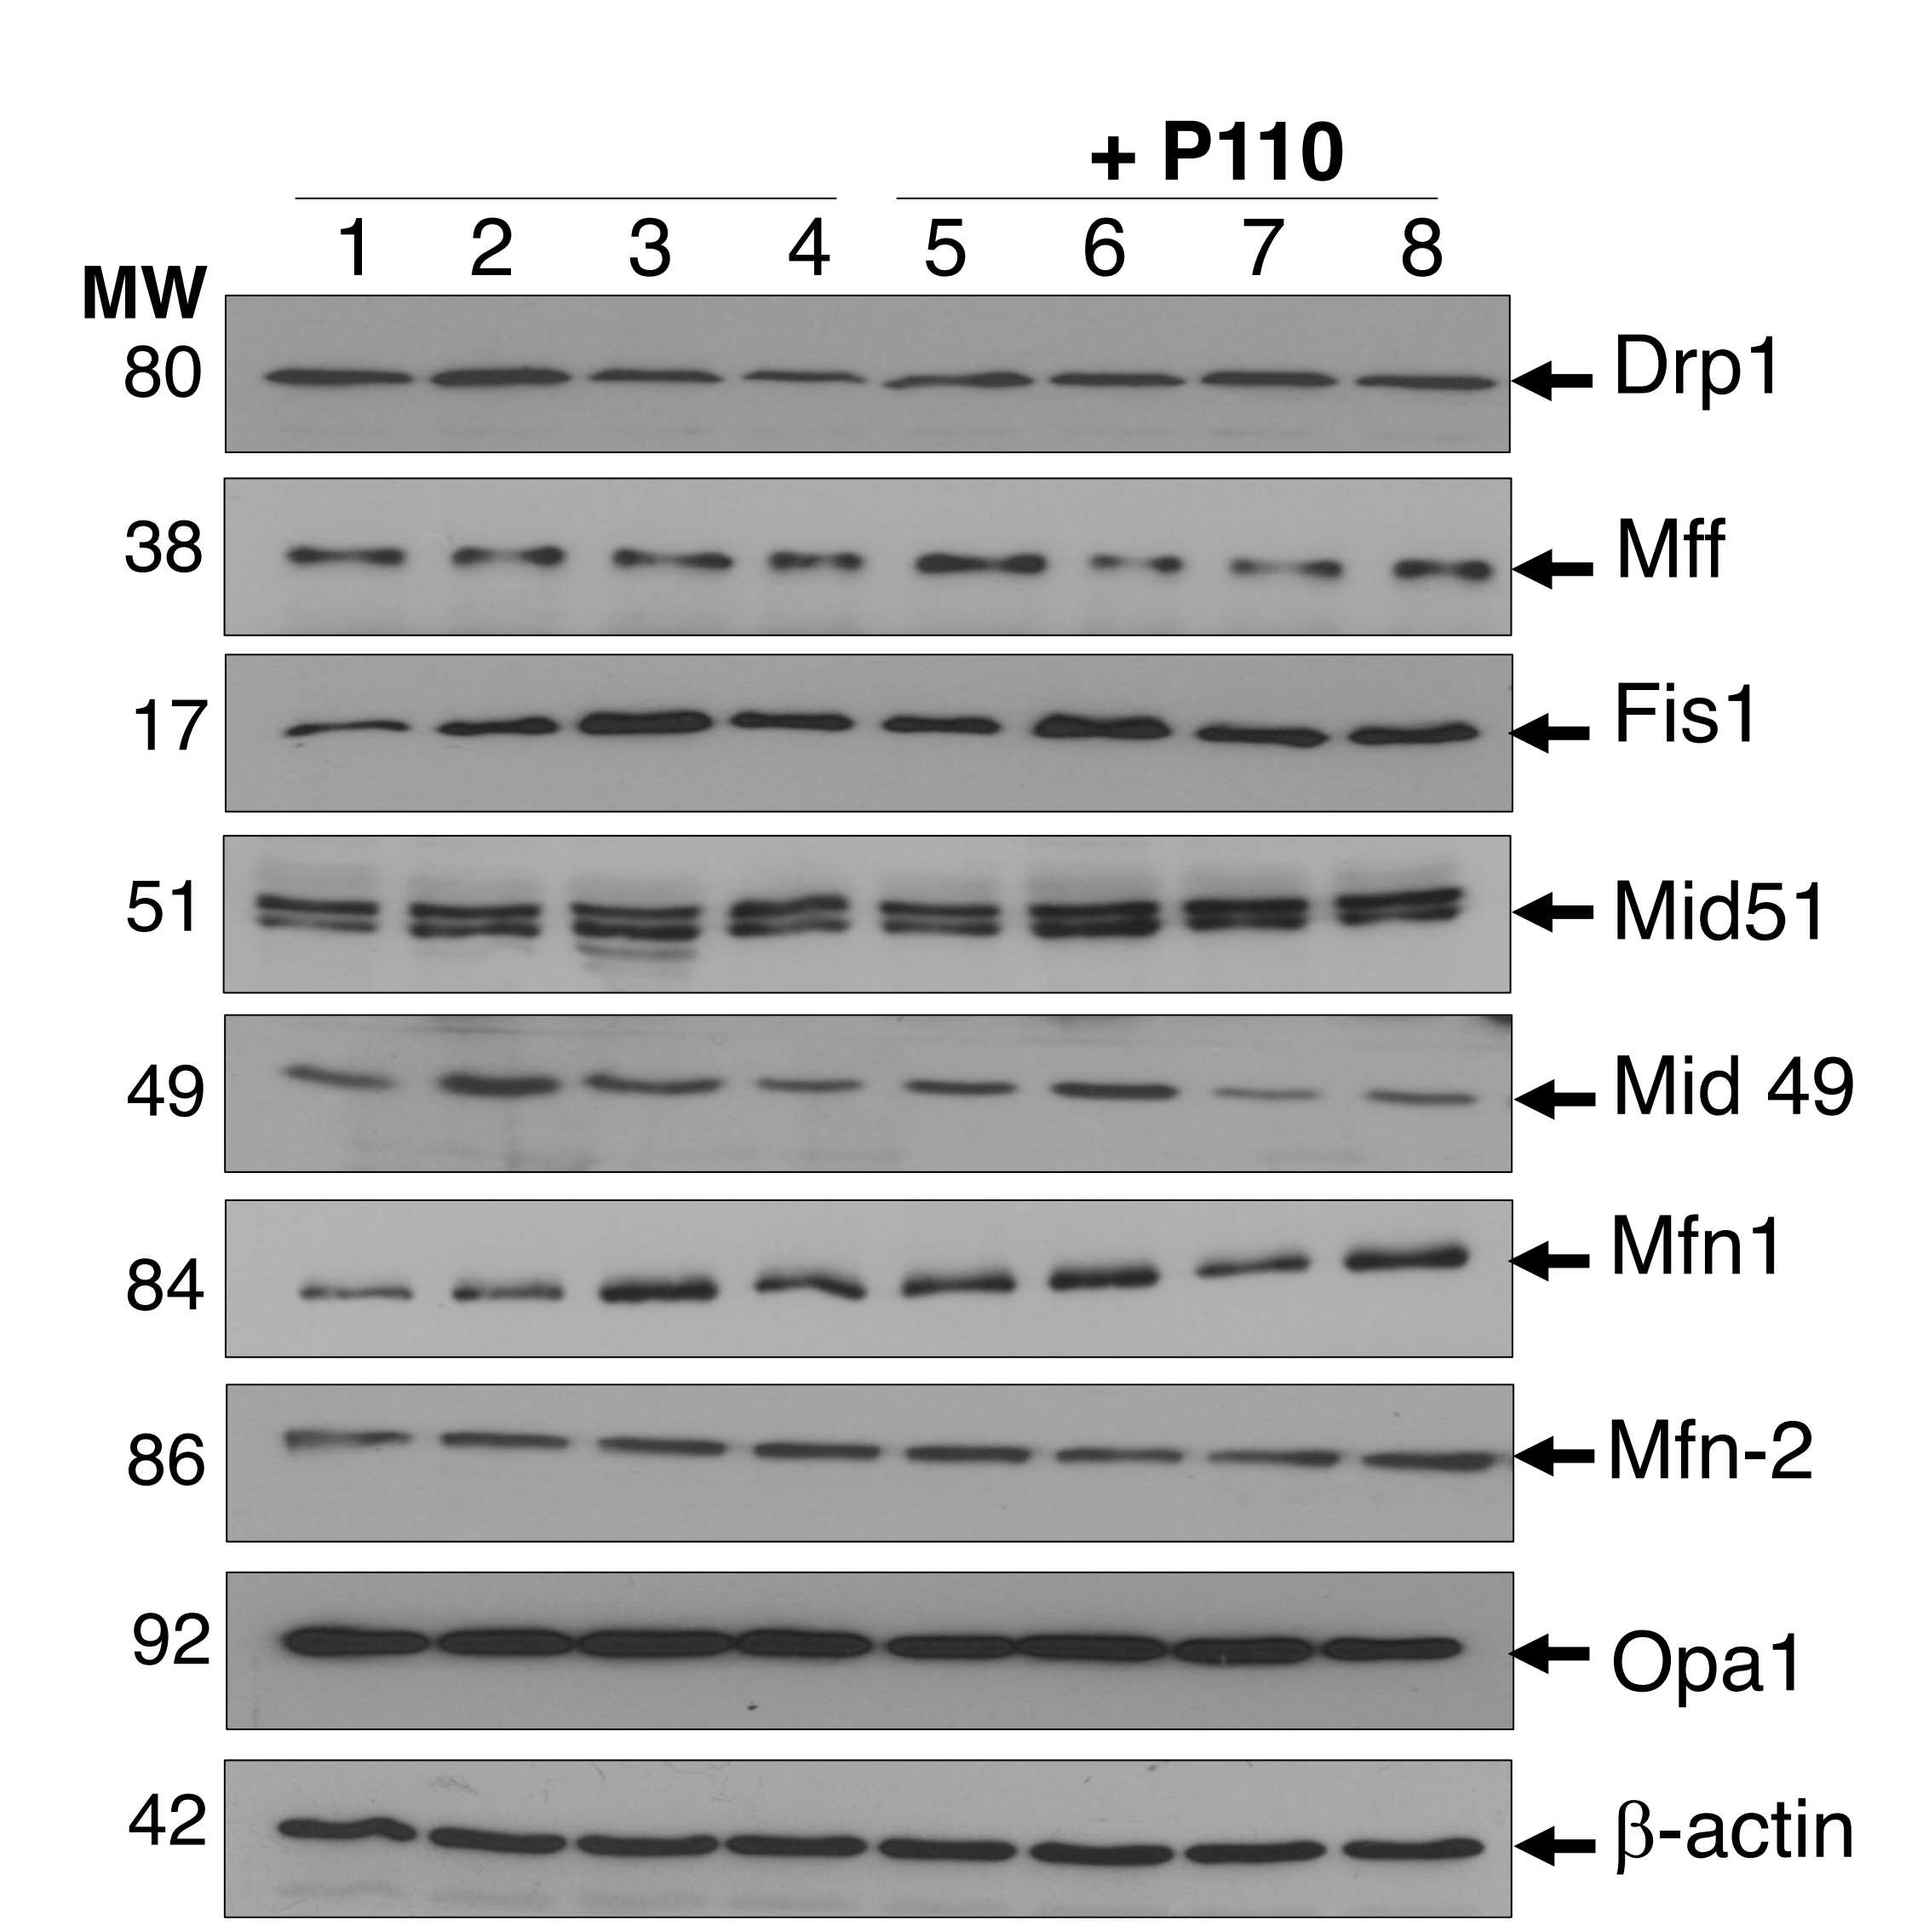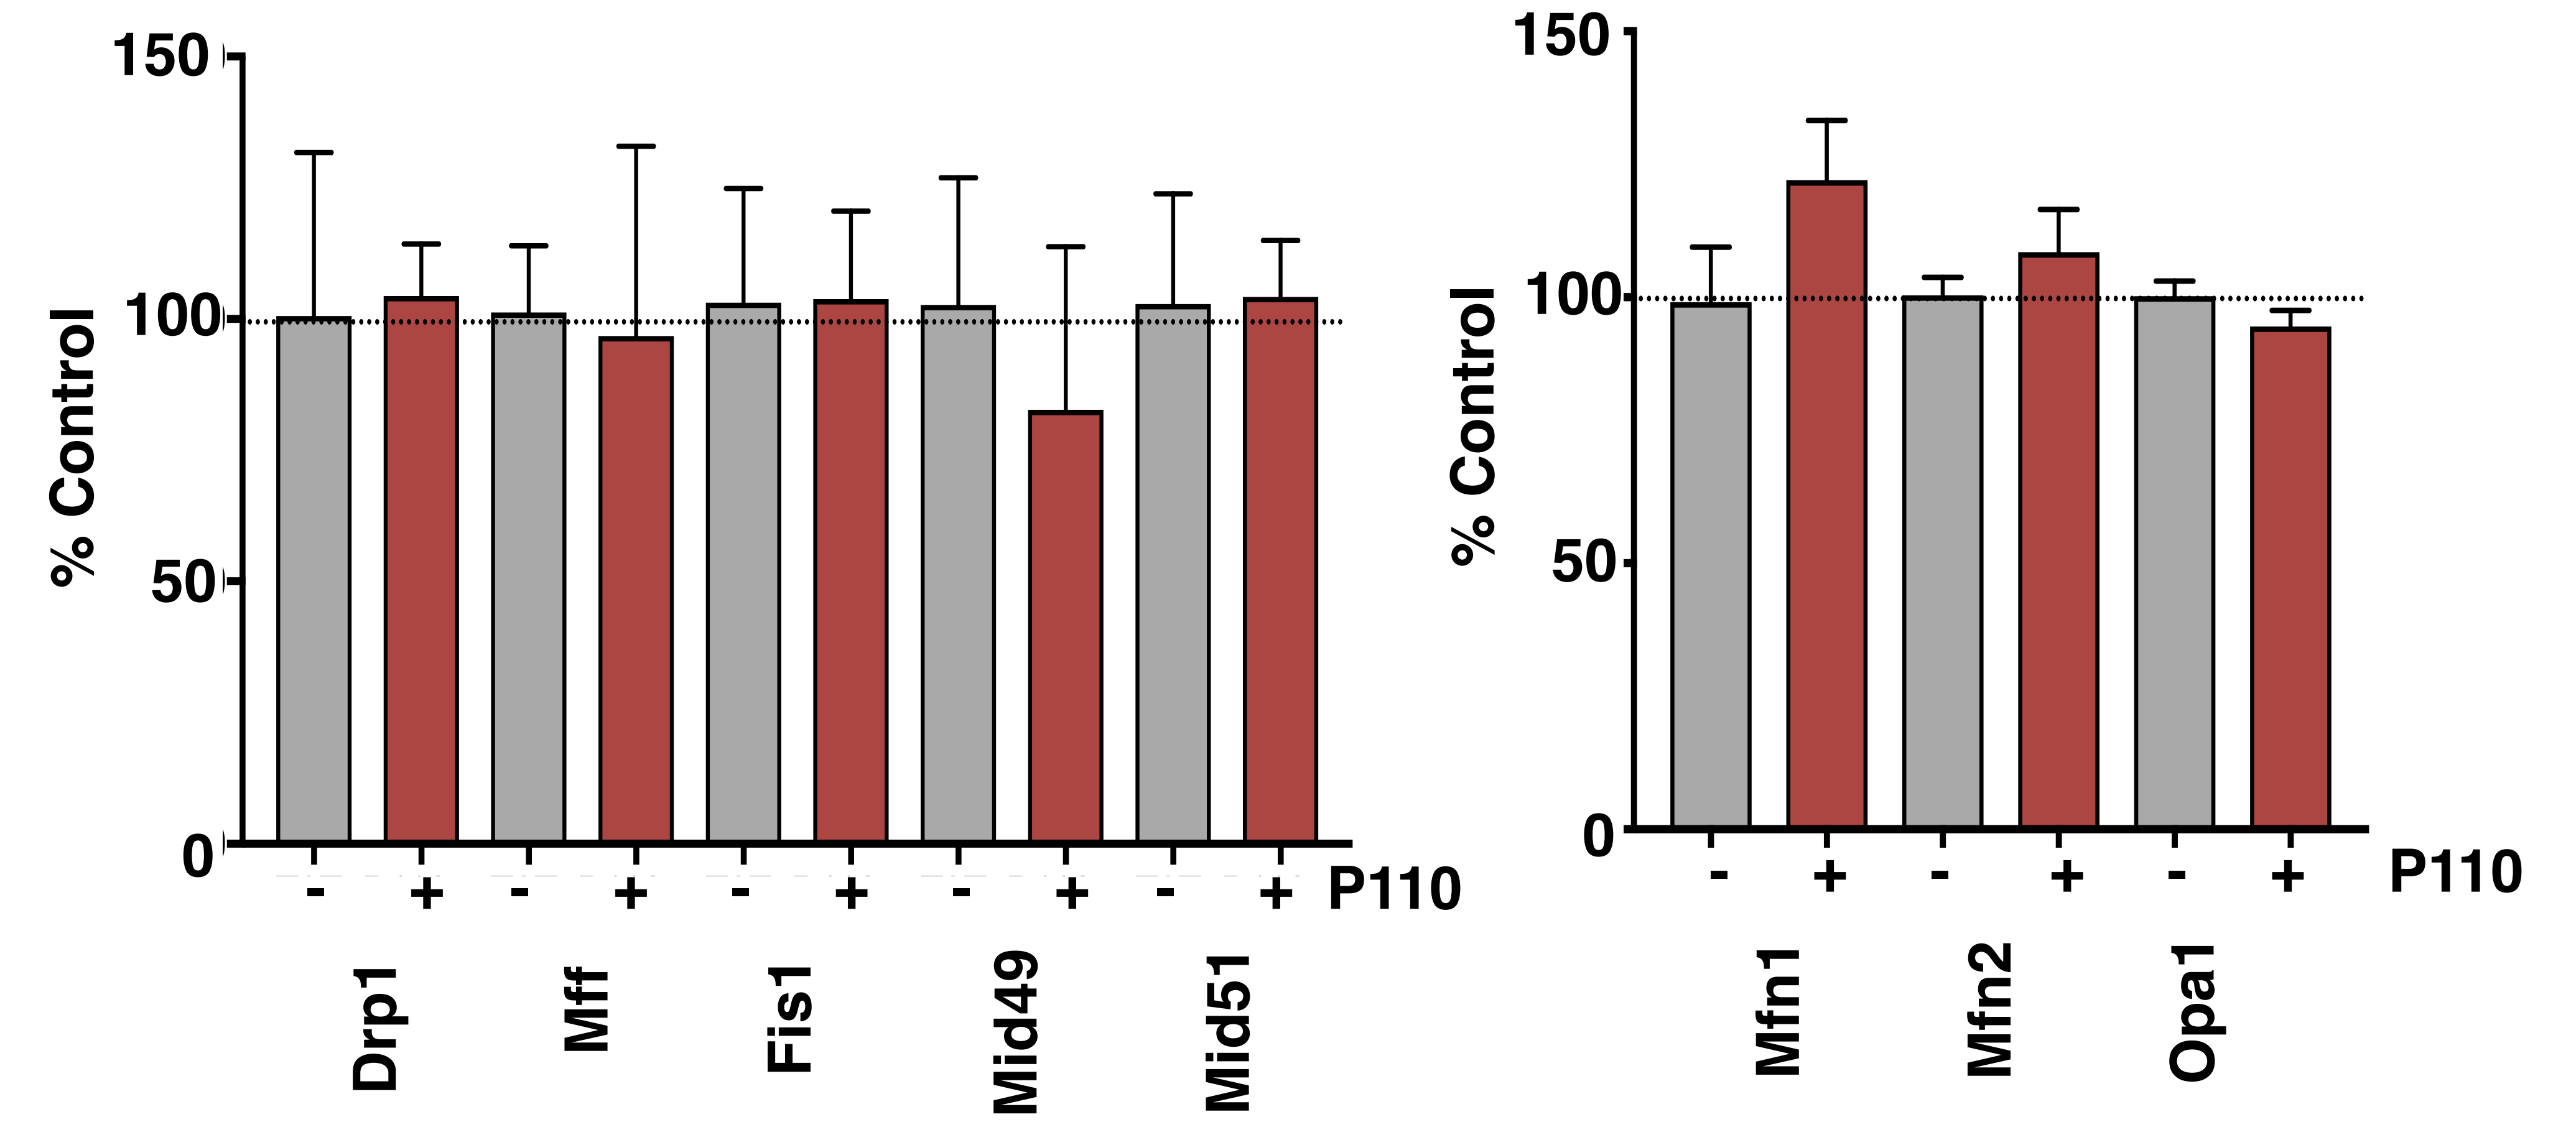

**E Mitochondrial health markers**

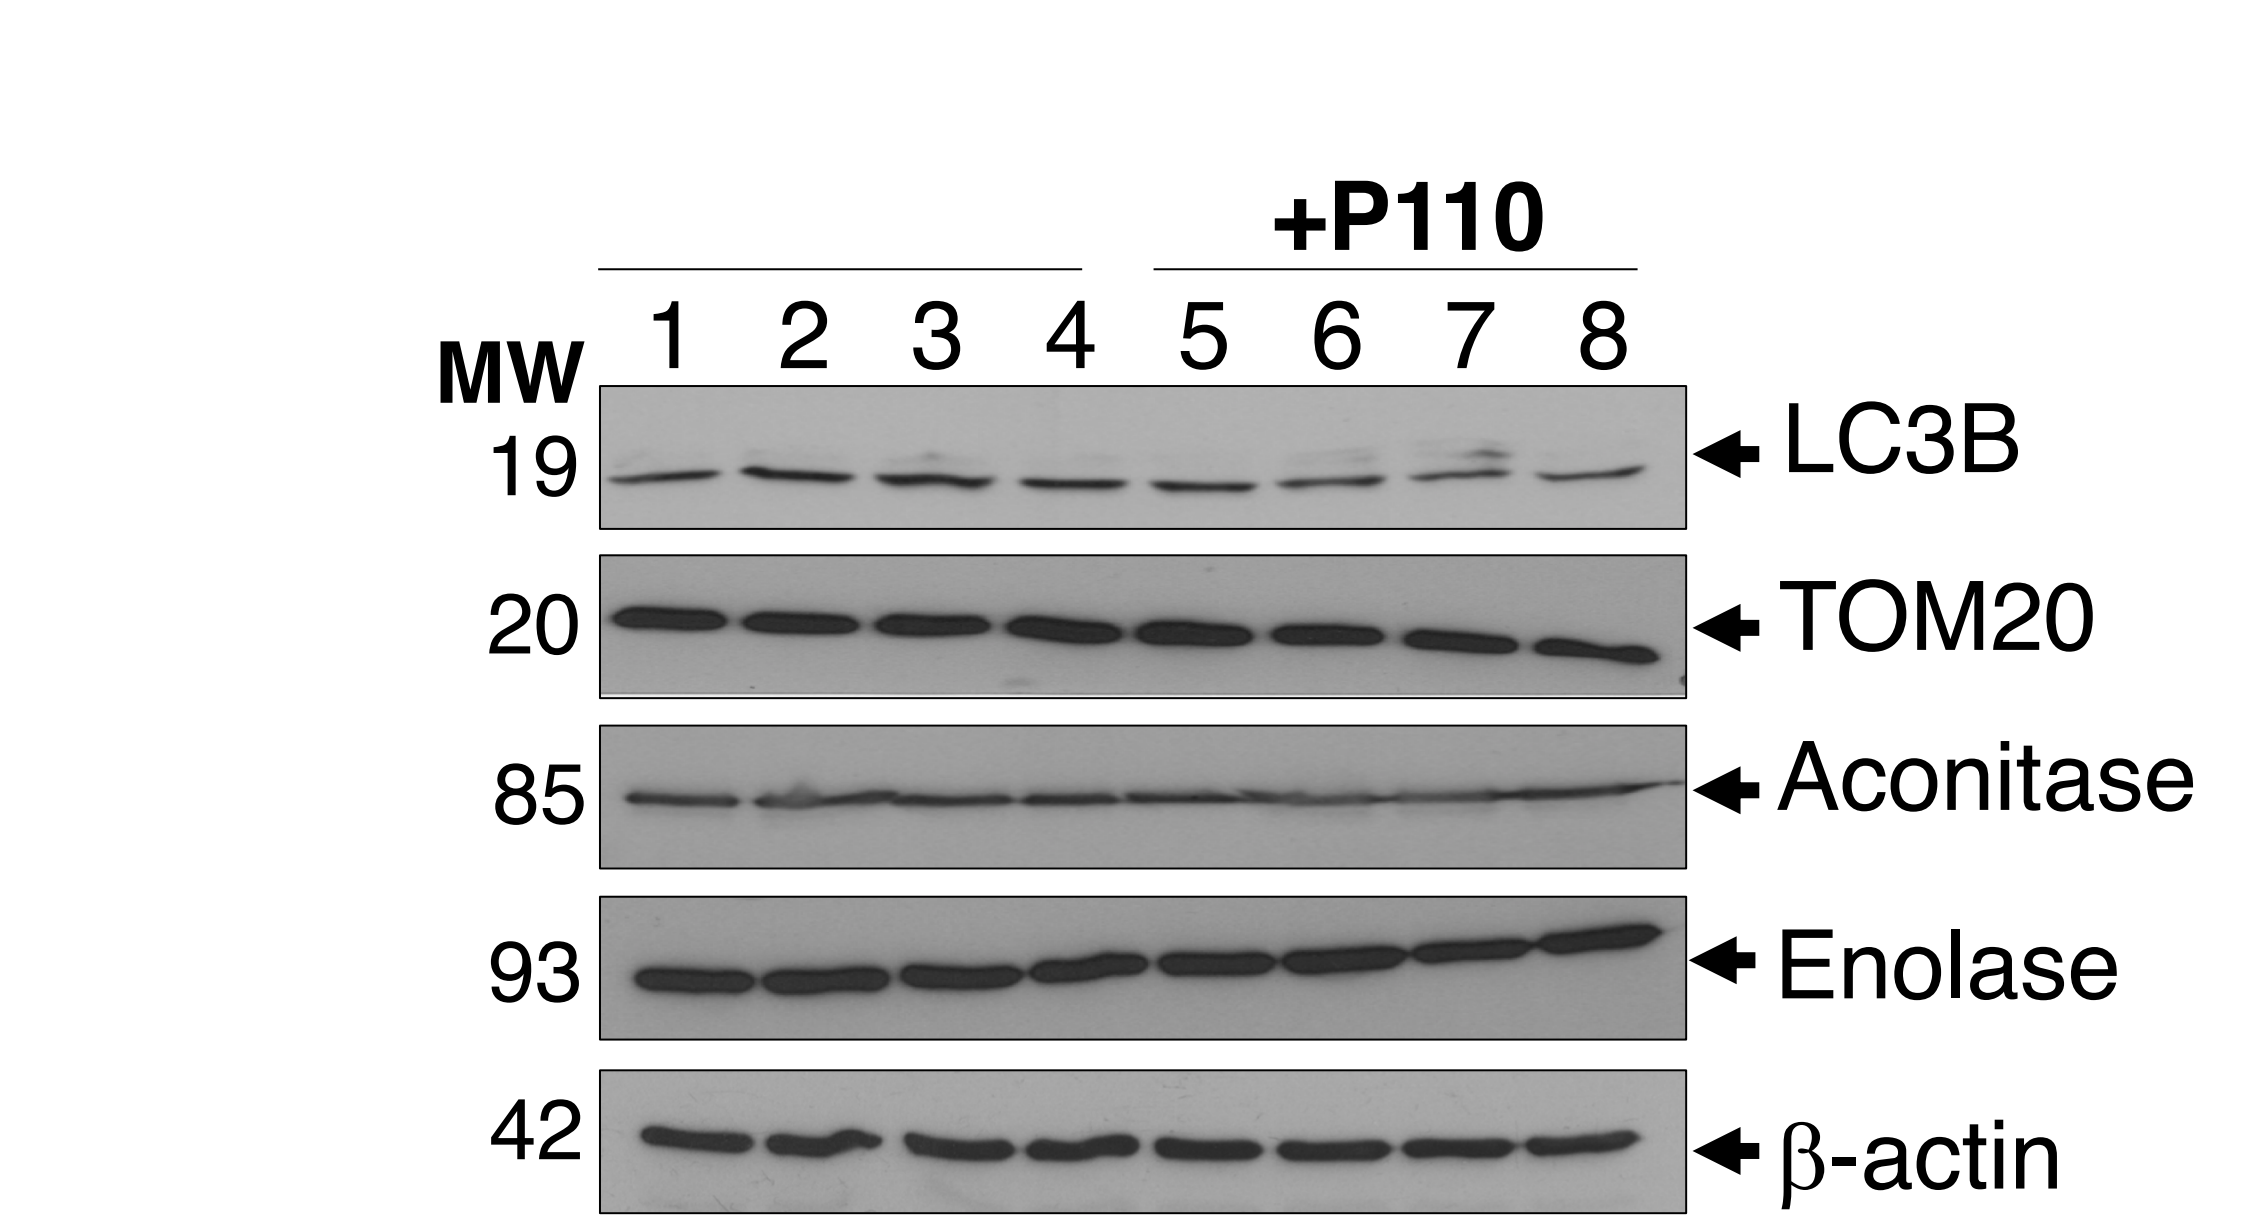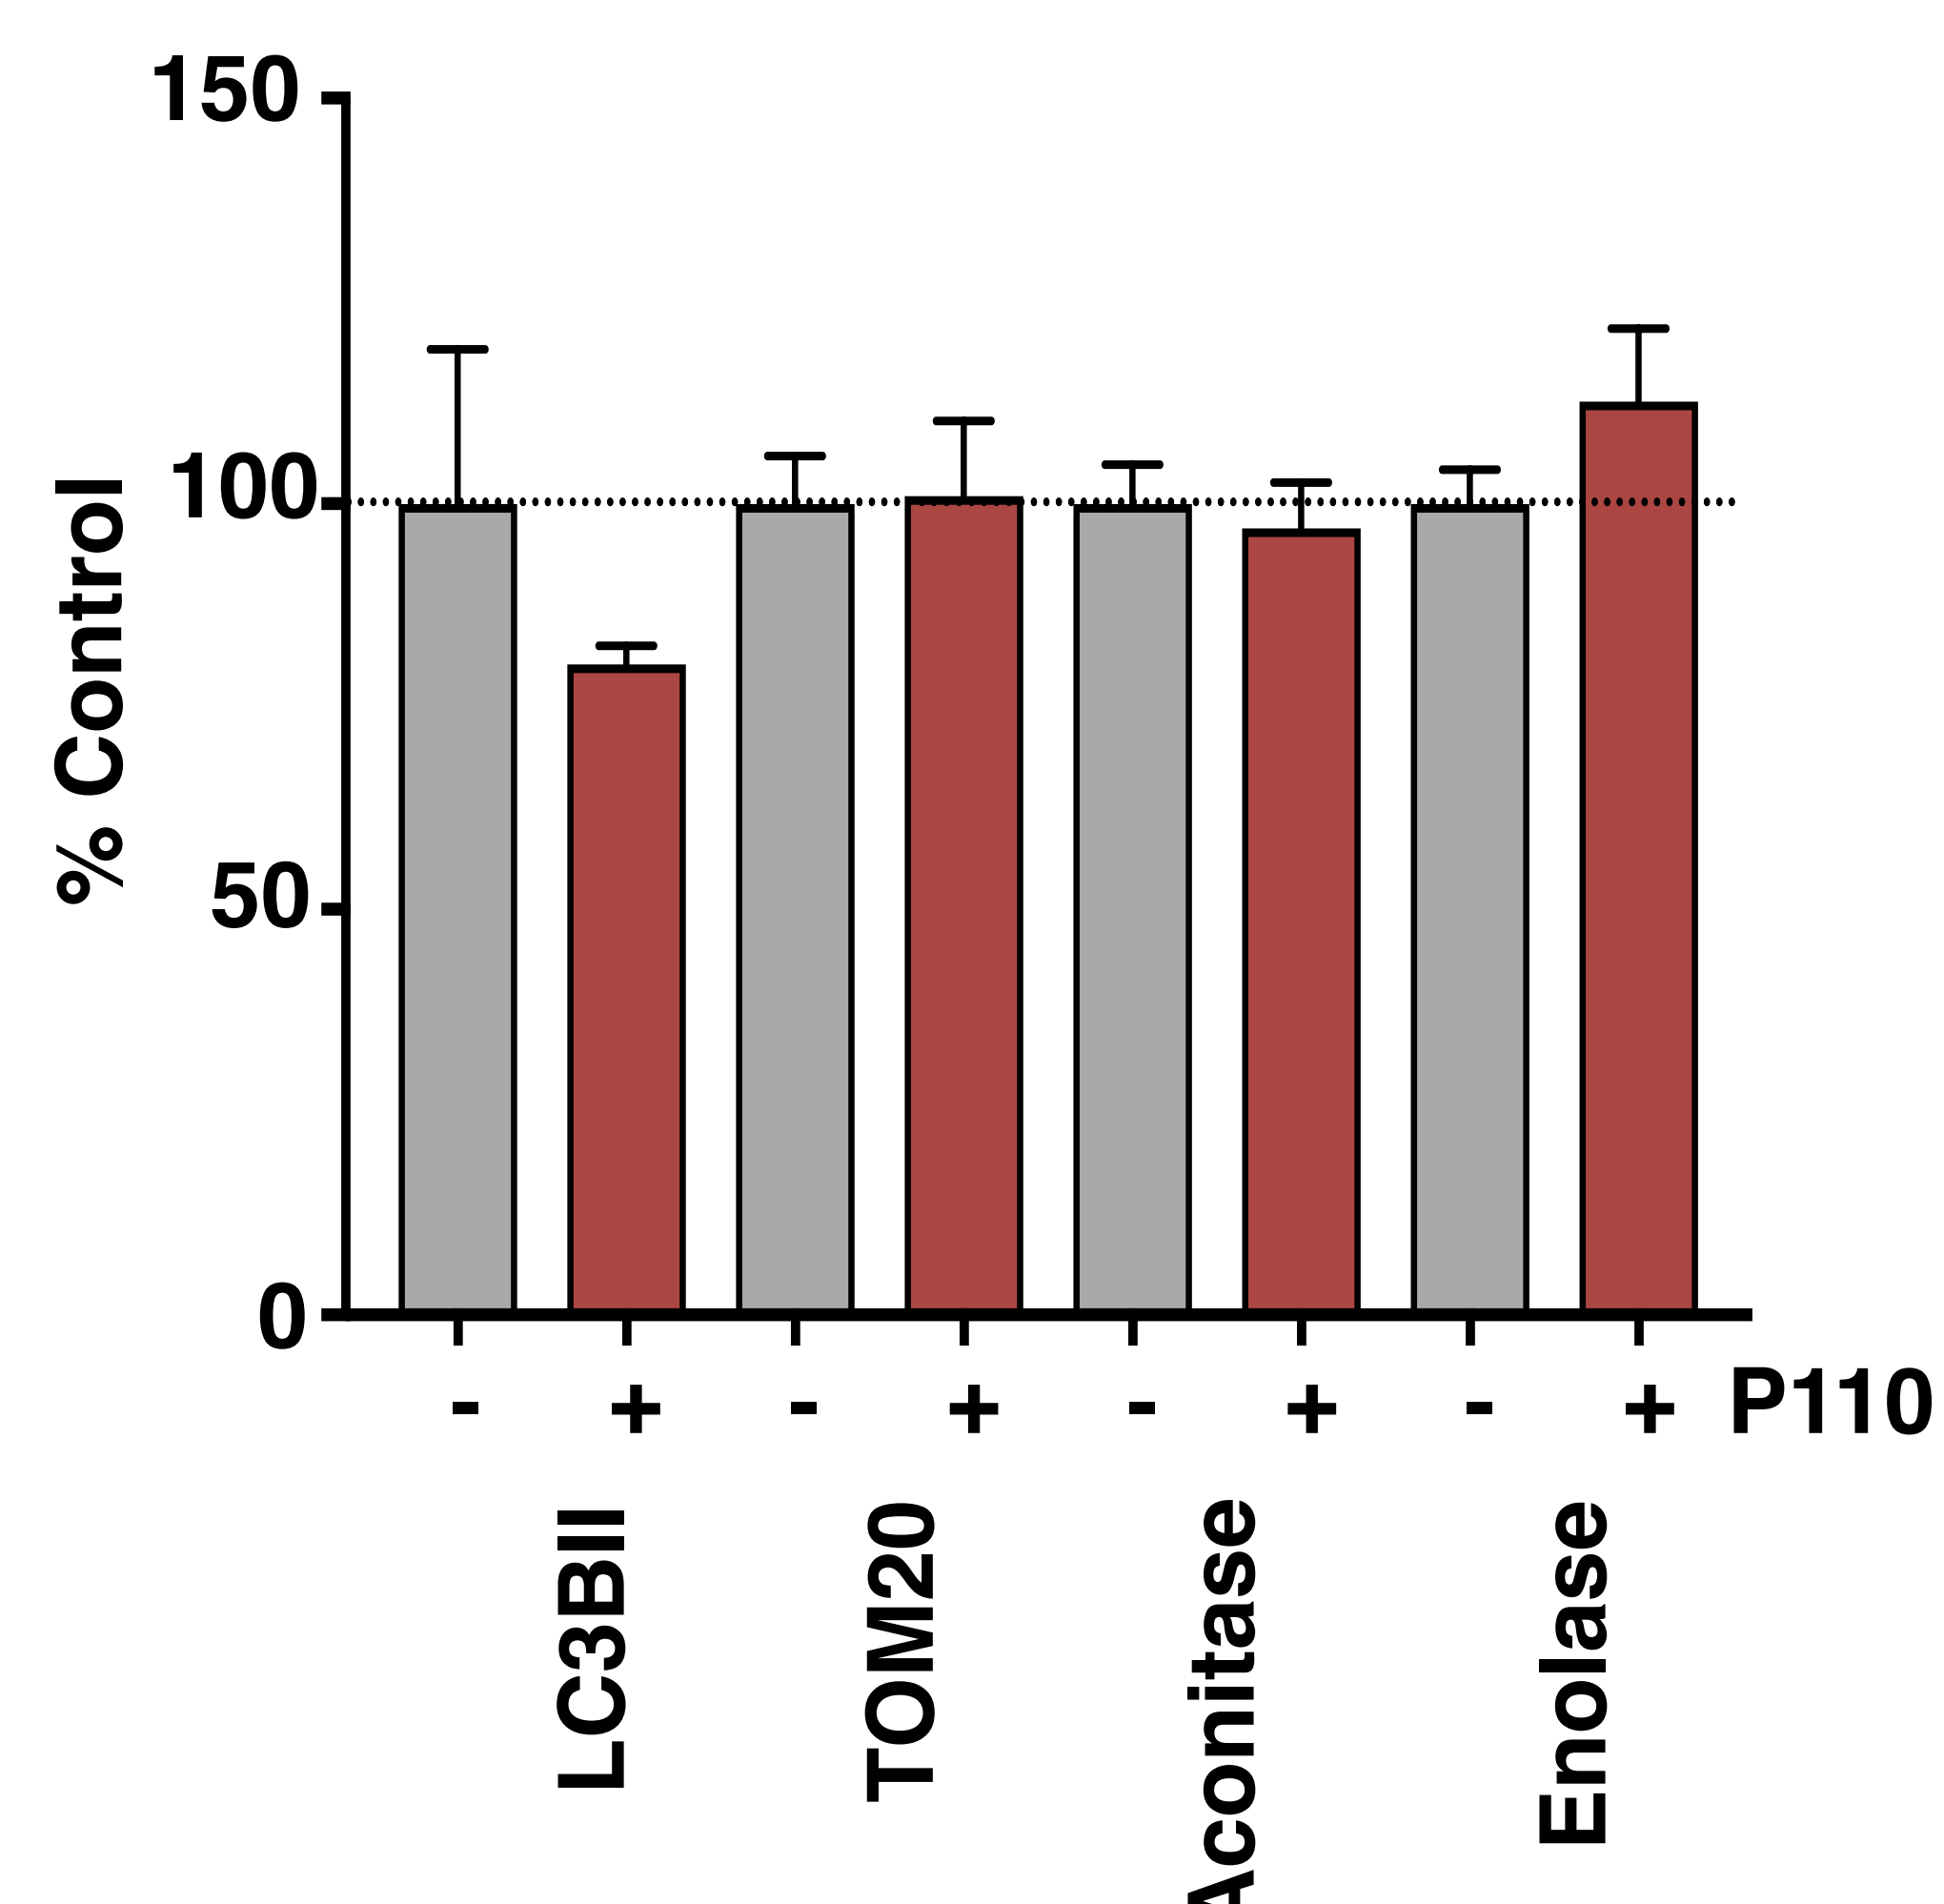

**F**

|                      | Control |      | P110  |      | p-value | unit   | n            |
|----------------------|---------|------|-------|------|---------|--------|--------------|
|                      | Mean    | SD   | Mean  | SD   |         |        |              |
| Glucose              | 195.3   | 20.5 | 205.4 | 37.5 | 0.5     | mg/dL  | 10/<br>group |
| AST                  | 100.0   | 47.1 | 84.3  | 20.7 | 0.4     | U/L    |              |
| ALT                  | 44.1    | 20.6 | 41.6  | 14.9 | 0.8     | U/L    |              |
| Alkaline Phosphatase | 74.8    | 27.5 | 67.3  | 29.3 | 0.6     | IU/L   |              |
| Total Bilirubin      | 0.2     | 0.1  | 0.2   | 0.1  | 0.6     | mg/dL  |              |
| BUN                  | 30.6    | 9.5  | 29.6  | 10.7 | 0.2     | mg/dL  |              |
| Creatinine           | 0.5     | 0.2  | 0.4   | 0.2  | 0.4     | mg/dL  |              |
| T.Protein            | 5.5     | 0.4  | 5.5   | 0.6  | 0.9     | g/dL   |              |
| Albumin              | 3.1     | 0.2  | 3.0   | 0.3  | 0.8     | g/dL   |              |
| Globulin             | 2.5     | 0.2  | 2.4   | 0.3  | 0.6     |        |              |
| Carbon Dioxide       | 16.6    | 2.1  | 16.4  | 2.1  | 0.9     | mmol/L |              |
| Na/K Ratio           | 18.4    | 3.5  | 16.3  | 2.1  | 0.2     |        |              |
| Anion Gap            | 31.5    | 3.2  | 32.2  | 2.7  | 0.7     | mmol/L |              |

|                    | Control |       | P110   |       | p-value | unit  | n           |
|--------------------|---------|-------|--------|-------|---------|-------|-------------|
|                    | Mean    | SD    | Mean   | SD    |         |       |             |
| WBC                | 12.1    | 2.5   | 12.8   | 1.6   | 0.6     | K/uL  | 5/<br>group |
| RBC                | 9.1     | 0.8   | 9.8    | 0.7   | 0.2     | M/uL  |             |
| Hgb                | 12.8    | 1.6   | 14.0   | 1.0   | 0.2     | gm/dL |             |
| HCT                | 42.8    | 4.3   | 47.5   | 3.6   | 0.1     | %     |             |
| MCV                | 47.2    | 1.3   | 48.4   | 1.9   | 0.3     | fL    |             |
| MCH                | 14.1    | 0.6   | 14.3   | 0.3   | 0.7     | pg    |             |
| MCHC               | 32.5    | 1.8   | 31.7   | 1.5   | 0.5     | g/dL  |             |
| Platelet count     | 1086.2  | 366.2 | 1048.4 | 274.9 | 0.9     | K/uL  |             |
| RDW                | 18.6    | 4.4   | 19.9   | 3.2   | 0.6     | %     |             |
| Reticulocyte Count | 4.7     | 0.7   | 4.9    | 1.0   | 0.7     | %     |             |
| IRF                | 54.3    | 1.3   | 56.5   | 2.8   | 0.2     | %     |             |
| Neutrophils        | 23.0    | 12.4  | 17.8   | 9.3   | 0.5     | %     |             |
| Lymphocytes        | 70.2    | 13.8  | 76.0   | 11.4  | 0.5     | %     |             |
| Monocytes          | 6.0     | 2.9   | 4.6    | 0.9   | 0.3     | %     |             |
| Eosinophils        | 2.0     | 1.6   | 1.8    | 1.3   | 0.8     | %     |             |



## Appendix Figure S1.

- A. Bright field image of an H&E stained sections showing normal liver architecture, and components of basic liver lobules, with portal area and central venule in both naïve and P110 treated mice. Similarly no changes were observed in the spleen size or morphology after 5-month treatment with vehicle or P110 at 3mg/kg/day in naïve mice ; $n = 10$ .
- B. Groom and rearing frequency as well as duration were analyzed using activity chamber and had no changes after 5-month treatment with vehicle or P110 at 3mg/kg/day in naïve mice;  $n = 10$ .
- C. Protein levels of cell stress markers including p53, pJNK, pAkt, Bcl-2, Caspase 3 and BAX were measured after 5-month treatment with vehicle or P110 at 3mg/kg/day in naïve mice showed no significant alterations.  $\beta$ -actin was used as a loading control. Protein levels were quantified and represented as % control;  $n = 4$ .
- D. Protein levels of mitochondrial fission and fusion proteins, including Drp1, Fis1, Mff, Mid49, Mid51, Mfn1, Mfn2 and Opa1 were measured after 5-month treatment with vehicle or P110 at 3mg/kg/day in naïve mice and showed no significant alterations.  $\beta$ -actin was used as a loading control. Protein levels were quantified and represented as % control;  $n = 4$ .
- E. Protein levels of mitochondrial health markers, including LC3BII, TOM20, Aconitase and Enolase were measured after 5-month treatment with vehicle or P110 at 3mg/kg/day in naïve mice and showed no significant alterations.  $\beta$ -actin was used as a loading control. Protein levels were quantified and represented as % control;  $n = 4$ .
- F. Hematology ( $n = 5$ ) & Clinical Chemistry ( $n = 5$ ) Testing was performed after 5-month treatment with vehicle or P110 at 3mg/kg/day in naïve mice and showed no significant alterations.

Data information: An experimenter who was blind to genotypes and drug groups conducted all the behavior and survival studies. Mean, standard deviation, and P-values are shown; probability by one-way ANOVA (with uncorrected Fisher's LSD post hoc test).

**Appendix Table 1**

List of antibodies used for western blot analysis:

| <b>Antibody name</b>       | <b>Company</b>                | <b>Catalog No</b> | <b>Dilution</b> |
|----------------------------|-------------------------------|-------------------|-----------------|
| Anti-Aconitase             | Abcam                         | 126595            | 1:1000          |
| Anti-ATF6                  | Novus Biologicals             | NBP1-40256        | 1:500           |
| Anti-BAX (Active)          | Enzo Life Sciences            | ALX-804-224-C100  | 1:500           |
| Anti-Bcl-2                 | Santa Cruz Biotechnology      | sc-492            | 1:500           |
| Anti-CHOP                  | Cell Signaling Technology     | 2895              | 1:500           |
| Anti-cytochrome c          | BD Pharmingen™                | 556432            | 1:2000          |
| Anti-Drp1                  | BD Transduction Laboratories™ | 611113            | 1:500           |
| Anti-eIF2a                 | Cell Signaling Technology     | 9722              | 1:200           |
| Anti-Enolase               | Santa Cruz Biotechnology      | sc-15343          | 1:1000          |
| Anti-Fis1                  | Proteintech                   | 10956-1-AP        | 1:1000          |
| Anti-GRP78                 | Abcam                         | 21685             | 1:500           |
| Anti-JNK                   | Cell Signaling Technology     | 9252              | 1:500           |
| Anti-LC3BII                | Cell Signaling Technology     | 3868              | 1:500           |
| Anti-Mff                   | Proteintech                   | 17090-1-AP        | 1:500           |
| Anti-Mfn1                  | Proteintech                   | 13798-1-AP        | 1:500           |
| Anti-Mfn2                  | Proteintech                   | 12186-1-AP        | 1:500           |
| Anti-Mid49                 | Proteintech                   | 16413-1-AP        | 1:500           |
| Anti-Mid51                 | Proteintech                   | 20164-1-AP        | 1:500           |
| Anti-Opa1                  | Santa Cruz Biotechnology      | sc-393296         | 1:500           |
| Anti-p53                   | Cell Signaling Technology     | 9282              | 1:1000          |
| Anti-p62                   | Abcam                         | 56416             | 1:500           |
| Anti-Parkin                | Abcam                         | 77924             | 1:500           |
| Anti-phospho-Drp1 (Ser616) | Cell Signaling Technology     | 3455              | 1:200           |
| Anti-phospho-Drp1 (Ser637) | Cell Signaling Technology     | 4867              | 1:200           |
| Anti-phospho-eIF2a         | Cell Signaling Technology     | 9721              | 1:500           |
| Anti-phospho-JNK           | Cell Signaling Technology     | 9251              | 1:200           |
| Anti-TOM20                 | Santa Cruz Biotechnology      | sc-11415          | 1:1000          |
| Anti-VDAC1                 | Abcam                         | 14734             | 1:2000          |
| Anti-XBP1                  | Abcam                         | 37152             | 1:500           |
| Anti-β-actin               | Cell Signaling Technology     | 3700              | 1:1000          |
