# Supplementary material for: Inhibition of Drp1/Fis1 interaction slows progression of amyotrophic lateral sclerosis
Source: PubMed Central journal article supplement (PMC5840540; doi:10.15252/emmm.201708166), 2018-01-15

Source Data Fig 5G.

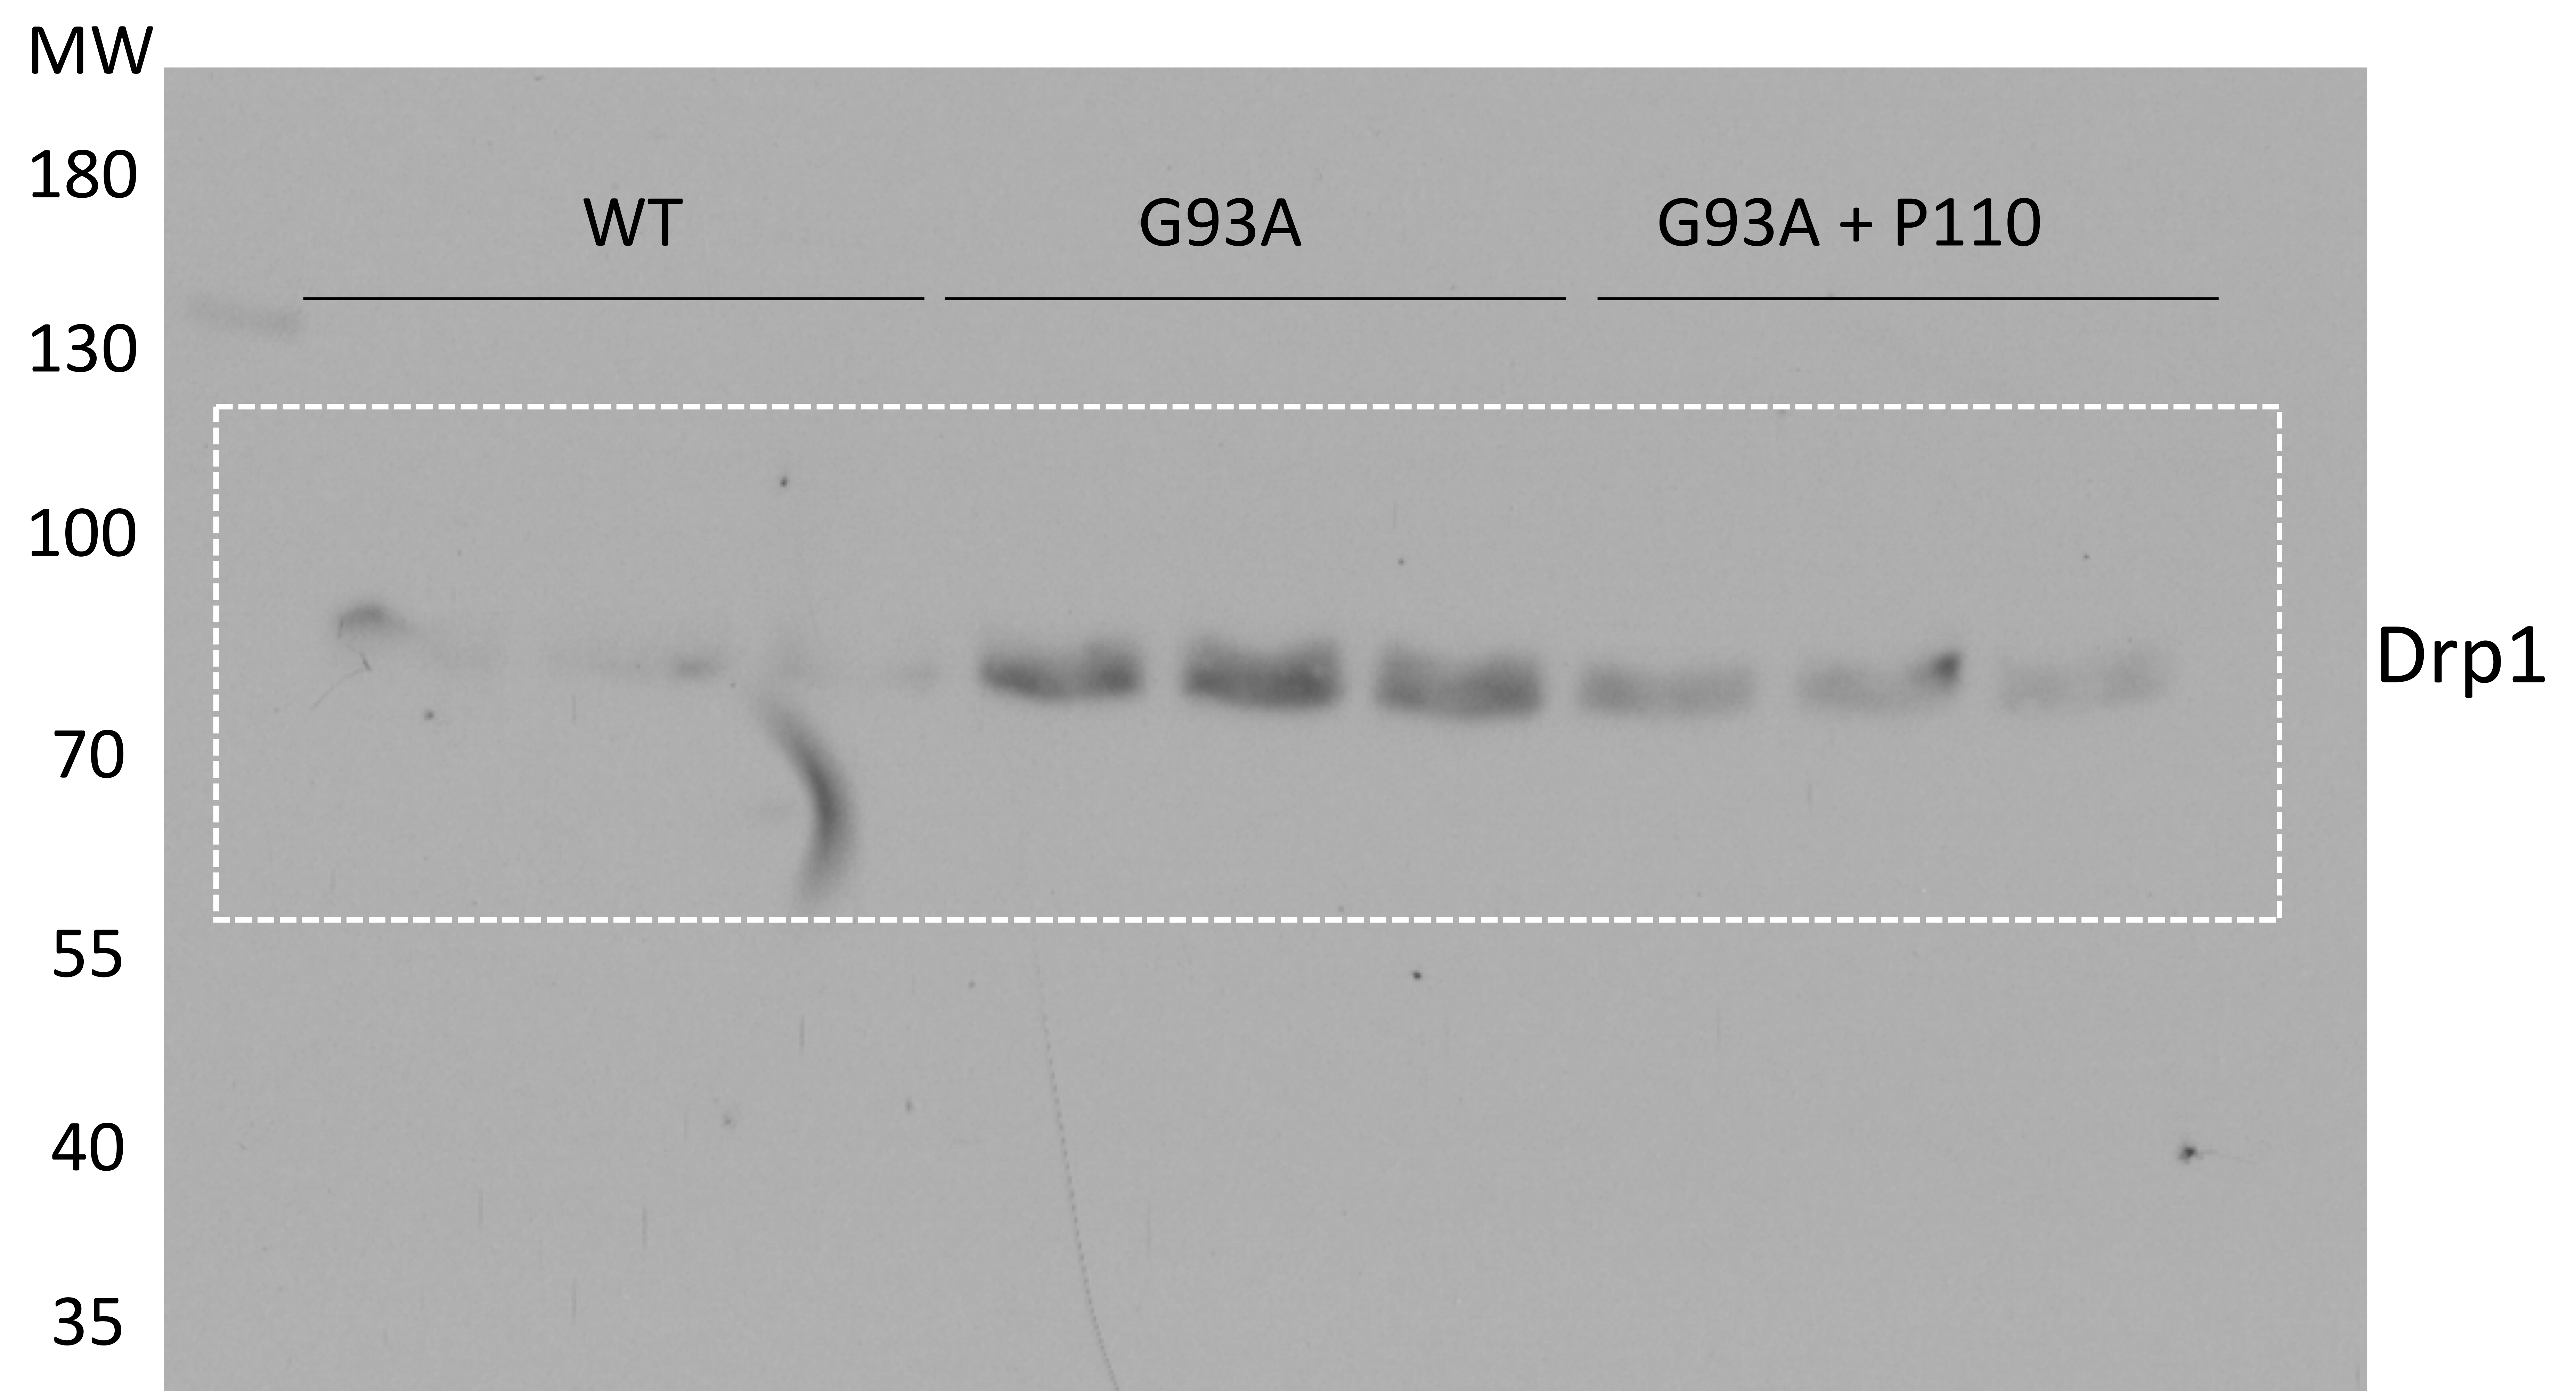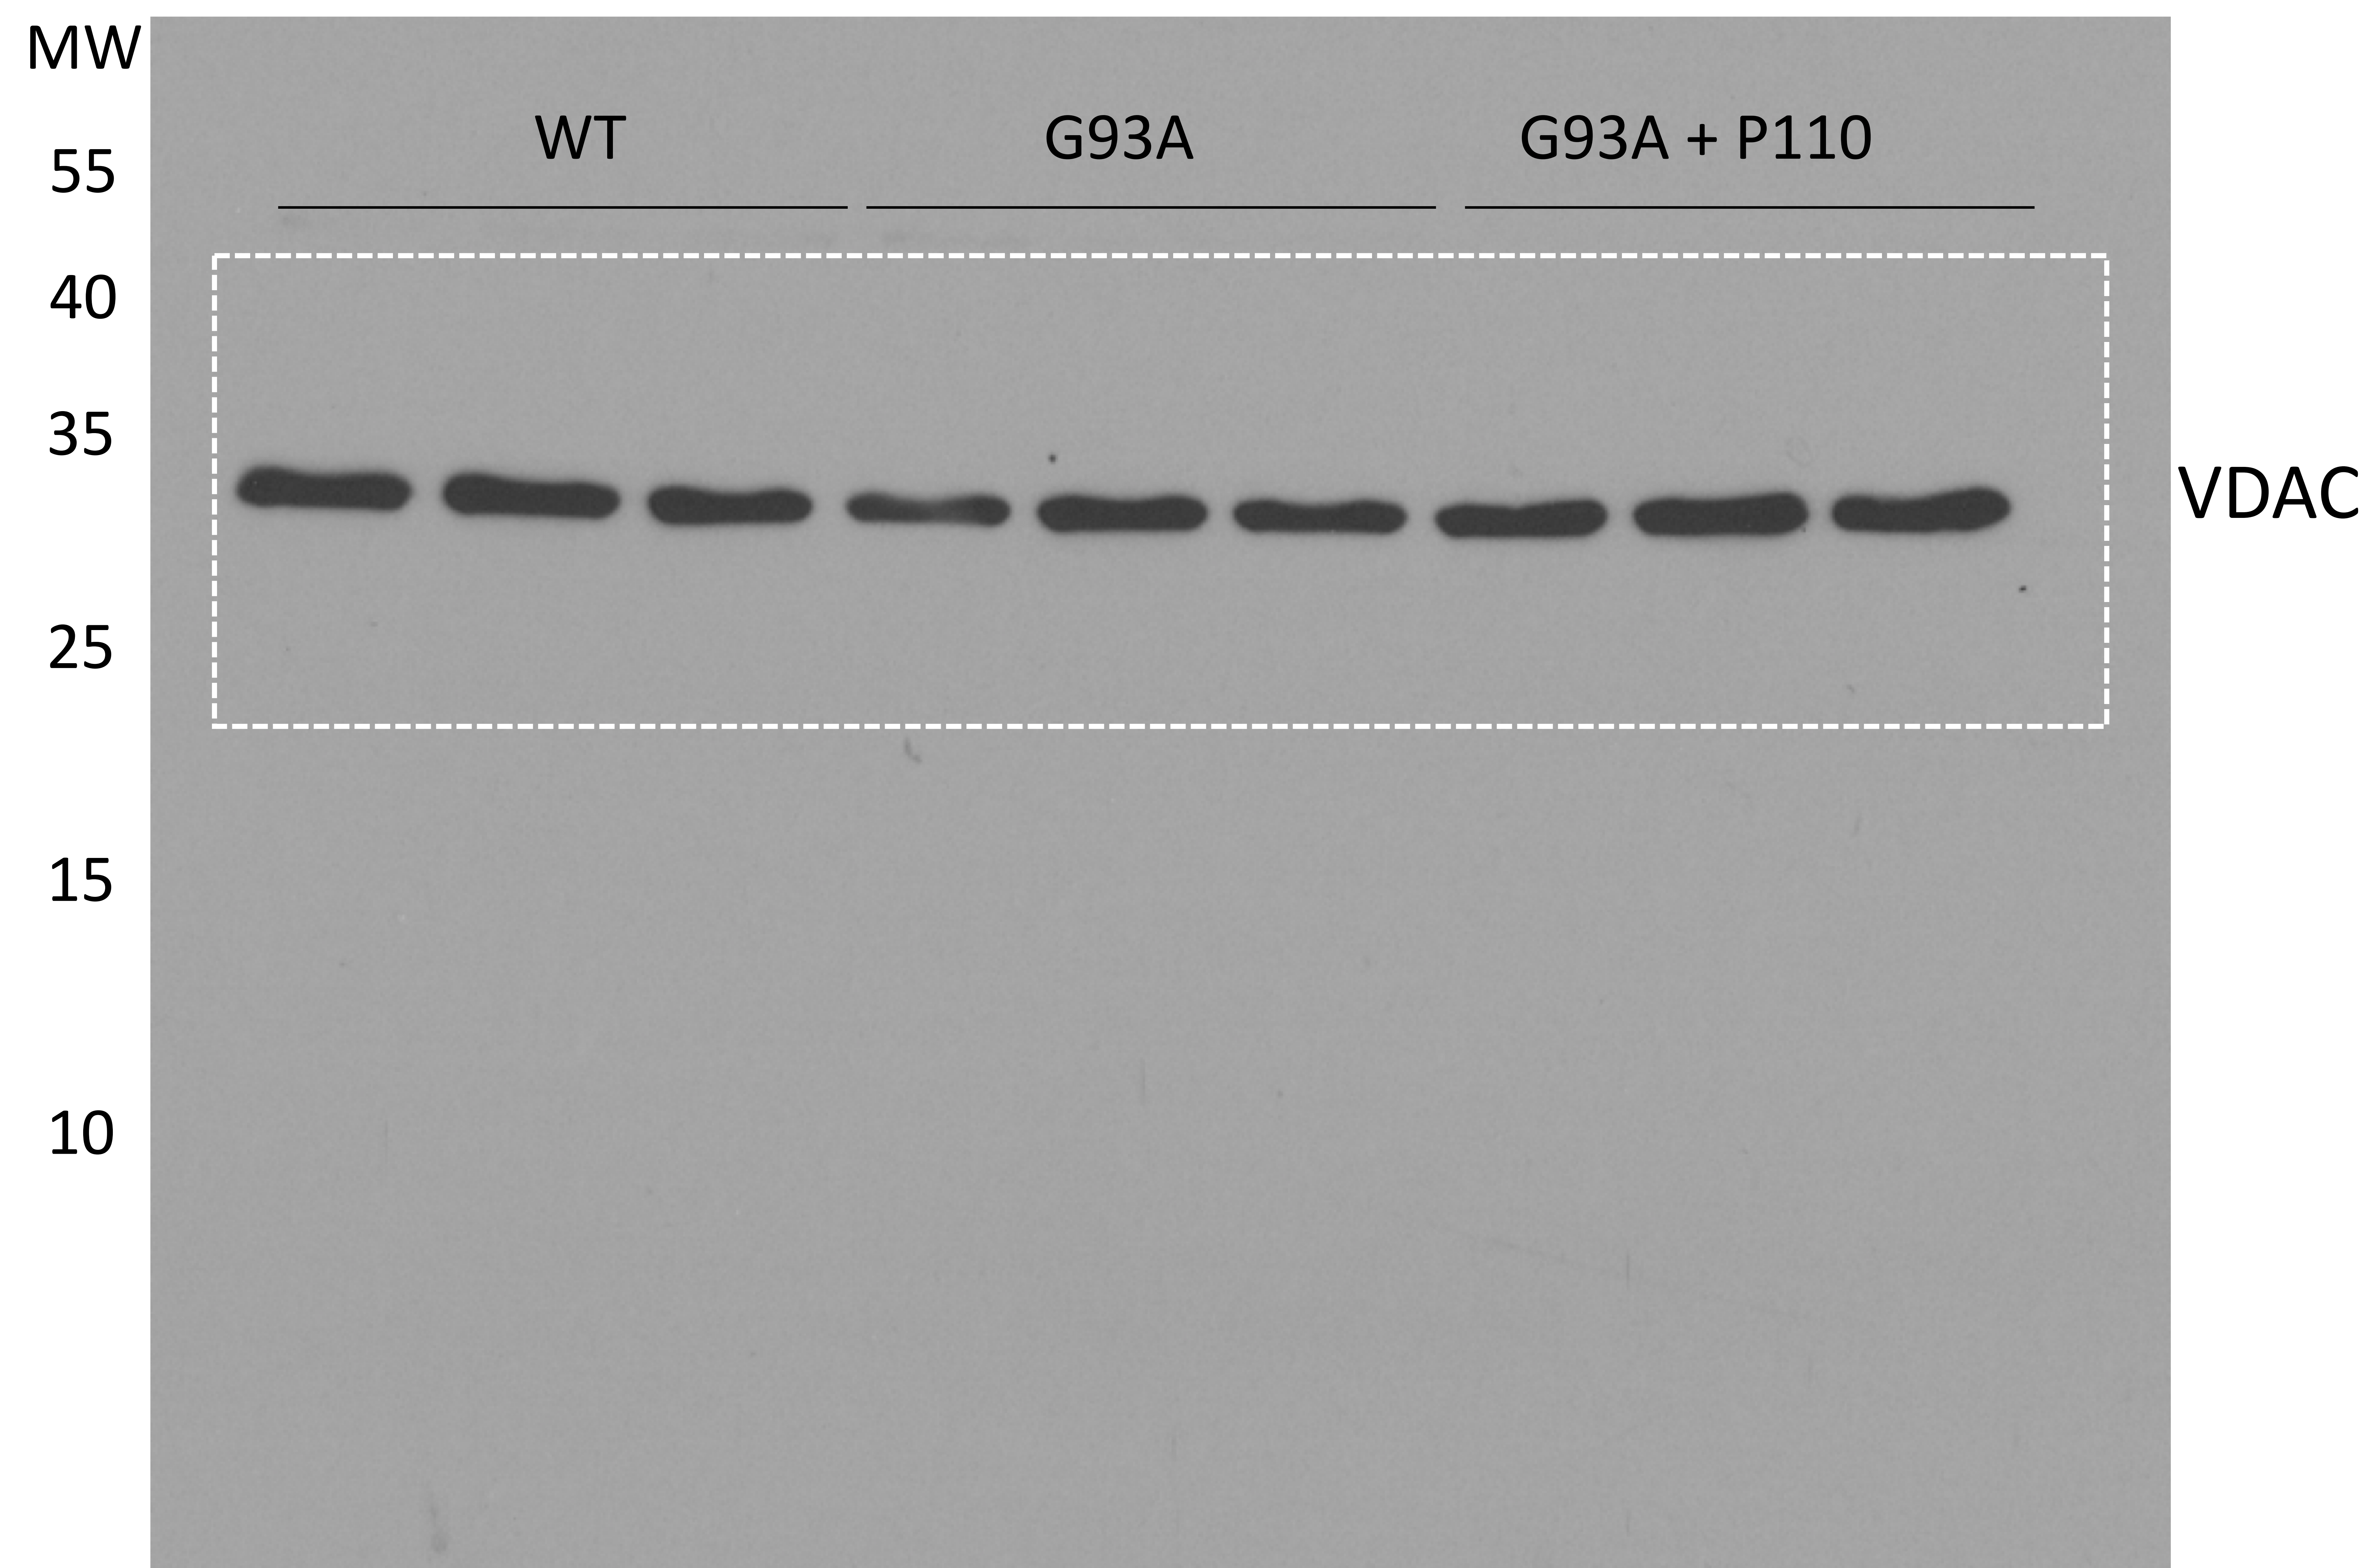

Supplement: EMMM-10-e8166-s004.pdf [file EMMM-10-e8166-s004.pdf]
